# Supplementary material for: Preparation of BaTiO3 nanocrystals using a two-phase solvothermal method
Source: Royal Society of Chemistry journal article supplement (doi:10.1039/b708914g), 2007-01-01
Supplement: b708914g.pdf [file b708914g.pdf]

## Supporting information for

### Oil/Water Two-Phase Solvothermal Synthesis of Hydrophobic BaTiO<sub>3</sub> Nanocrystals

By *Hongchu Du, Sebastian Wohlrab, Margarita Weiß, and Stefan Kaskel\**

*Department of Inorganic Chemistry*

*Technical University of Dresden*

*Mommsenstr. 6, 01069 Dresden, Germany*

*E-mail: [Stefan.Kaskel@chemie.tu-dresden.de](mailto:Stefan.Kaskel@chemie.tu-dresden.de)*

#### 1. Supporting figures

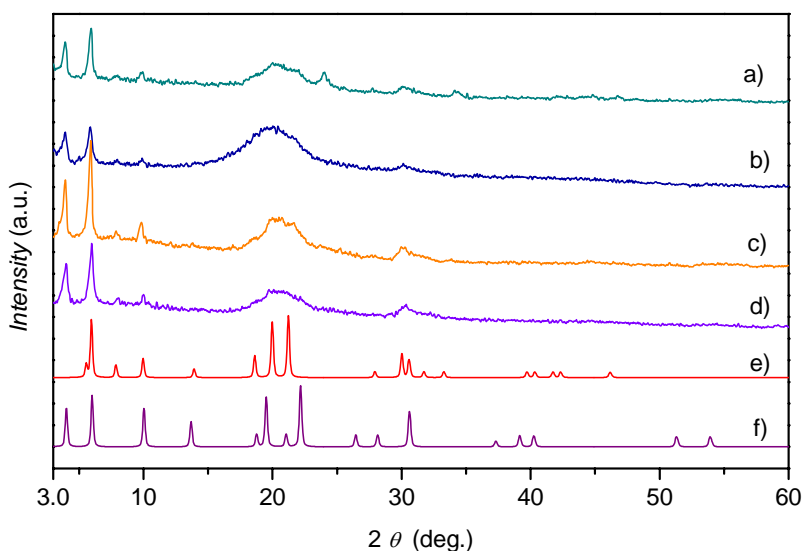

**Figure 1.** XRD patterns of by-products collected from the upper crude oil phases: a) 15 mL of hexadecene, 5 mL of 4 M NaOH aqueous solution, b) 10 mL of hexadecene, 10 mL of 4 M NaOH aqueous solution, c) 15 mL of toluene, 5 mL of 4 M NaOH aqueous solution, d) 15 mL of heptane, 5 mL of 4 M NaOH aqueous solution, e) simulation of sodium oleate (PDF 33-1879), and f) simulation of gamma-sodium stearate (PDF 2-289).

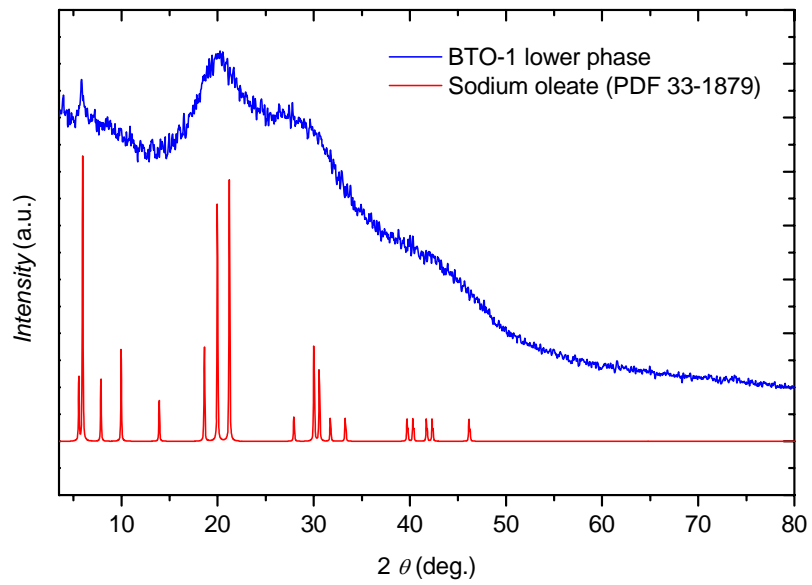

**Figure 2.** XRD pattern of the by-products from the lower water/ethanol phase after using ethanol to achieve phase separation (precipitated using acetone).
